# Supplementary material for: Population Structure of Lassa Mammarenavirus in West Africa
Source: MDPI journal article supplement (doi:10.3390/v12040437), 2020-04-13
Supplement: s1 [file s1]

## Supplementary Material

**Figure S1. DAPC cluster selection.** Bayesian Information Criterion (BIC) values versus number of clusters.

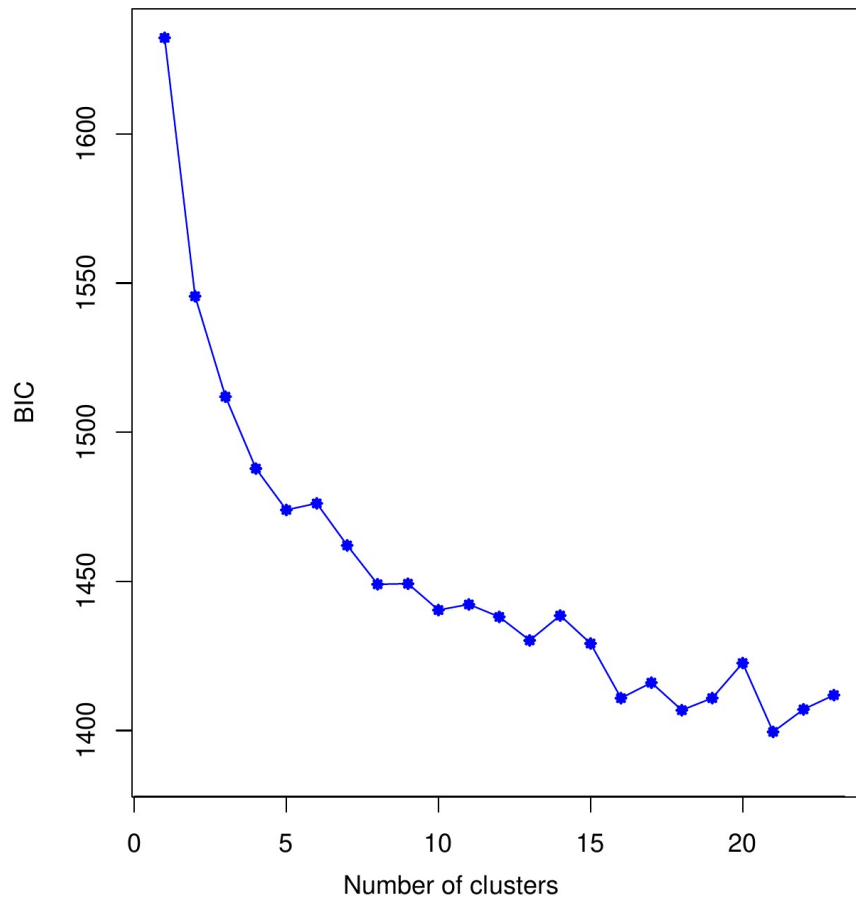

**Figure S2. Population structure of LASV in West Africa.** Analysis of optimal K for STRUCTURE analysis. **A.** Mean and variance of  $\ln(\Pr(X|K))$  for K values from 1 to 12. **B.**  $\Delta K$  for values of K from 2 to 11.  $\Delta K$  is calculated as  $\Delta K = \text{mean}(|L''(K)|) / \text{sd}(L(K))$ . Plots were generated with STRUCTURE HARVESTER [1].

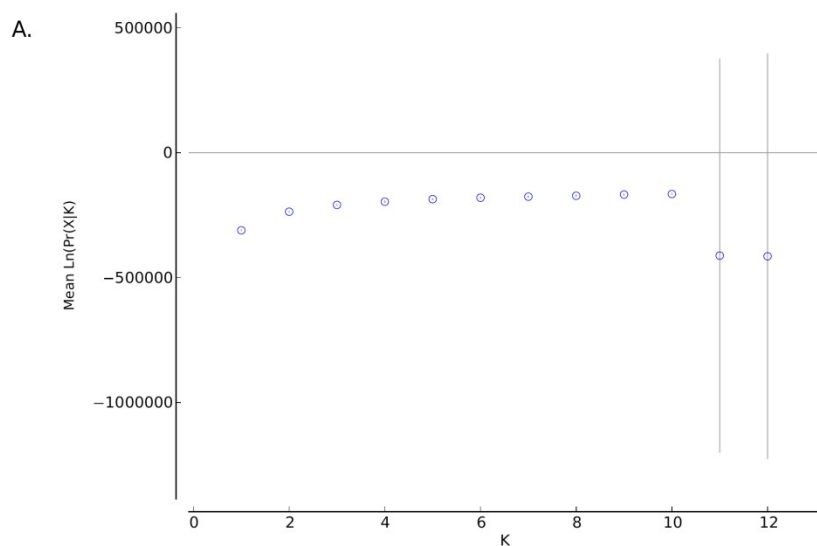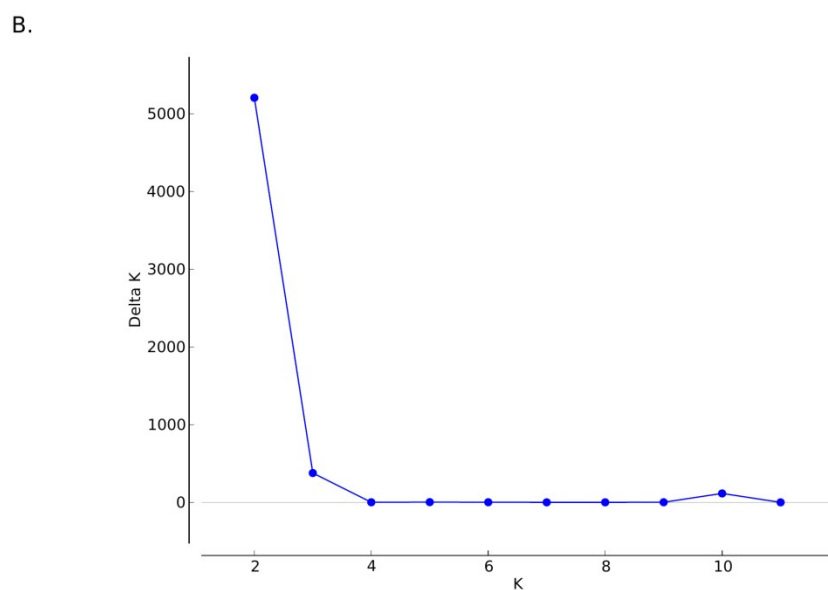

**Figure S3. Population structure of lineage IIg.** Analysis of optimal K for STRUCTURE analysis. **A.** Mean and variance of  $\ln(\Pr(X|K))$  for K values from 1 to 10. **B.**  $\Delta K$  for values of K from 2 to 9.  $\Delta K$  is calculated as  $\Delta K = \text{mean}(|L''(K)|) / \text{sd}(L(K))$ . STRUCTURE HARVESTER [1].

A.

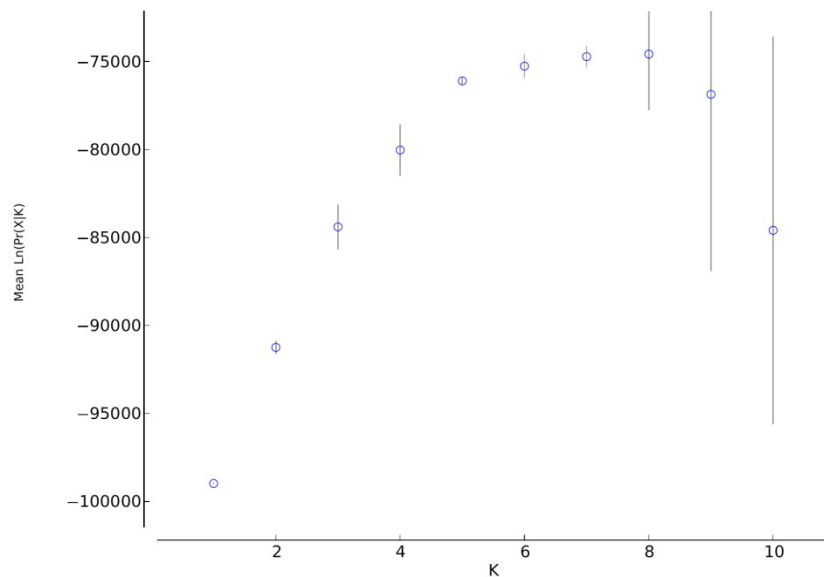

B.

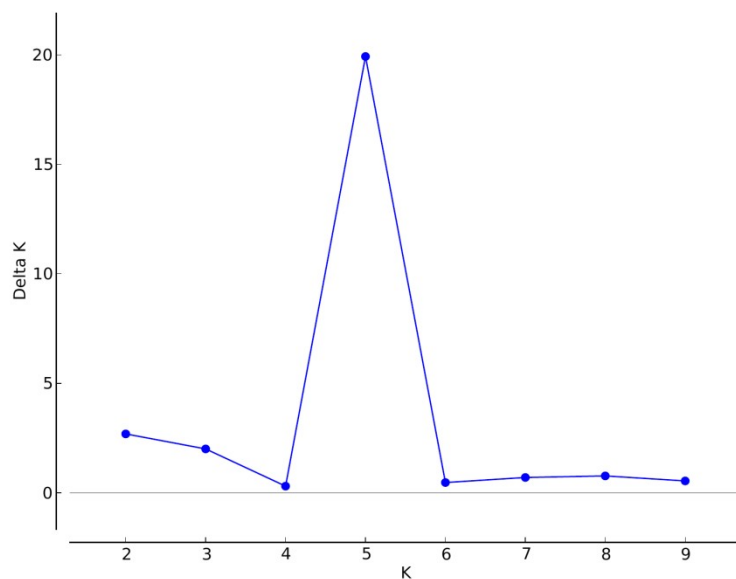

**Figure S4. Plasma viral loads in clade IIg strains.** Comparisons of plasma viral loads (z-scores) for patients infected with viruses having more or less than 50% of ancestry from component IIg-1. Values are reported as mean and standard error. The asterisk denotes a significant difference (t-test, two-tailed,  $p = 0.05$ ).

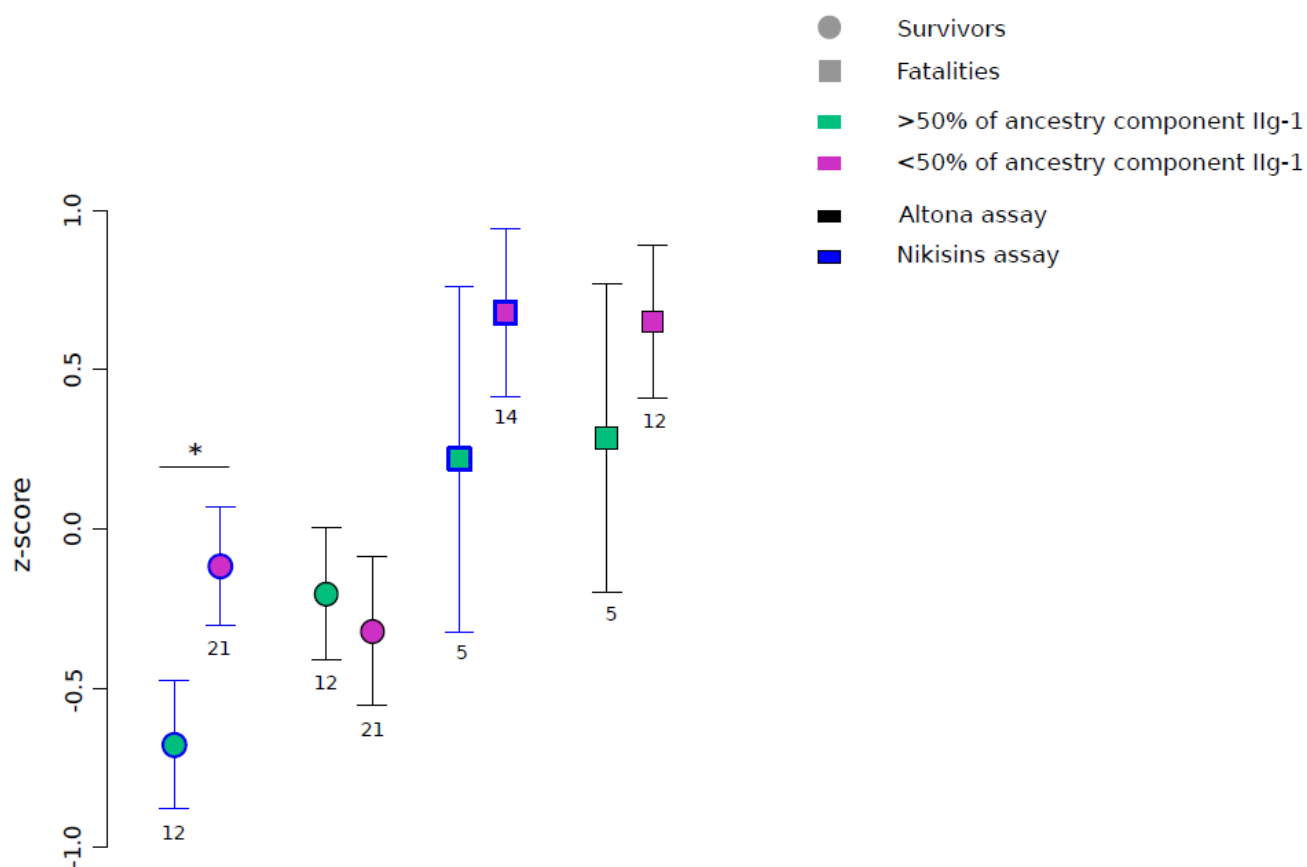

**Figure S5. Variant distribution of IIg-1 component.** Site by site probability for a few representative II-g strains having at least 50% of ancestry component IIg-1. Each line represents a genome and each dot represents a SNP with a probability >0.90 to derive from the component IIg-1. A schematic representation of a LASV genome is also shown.

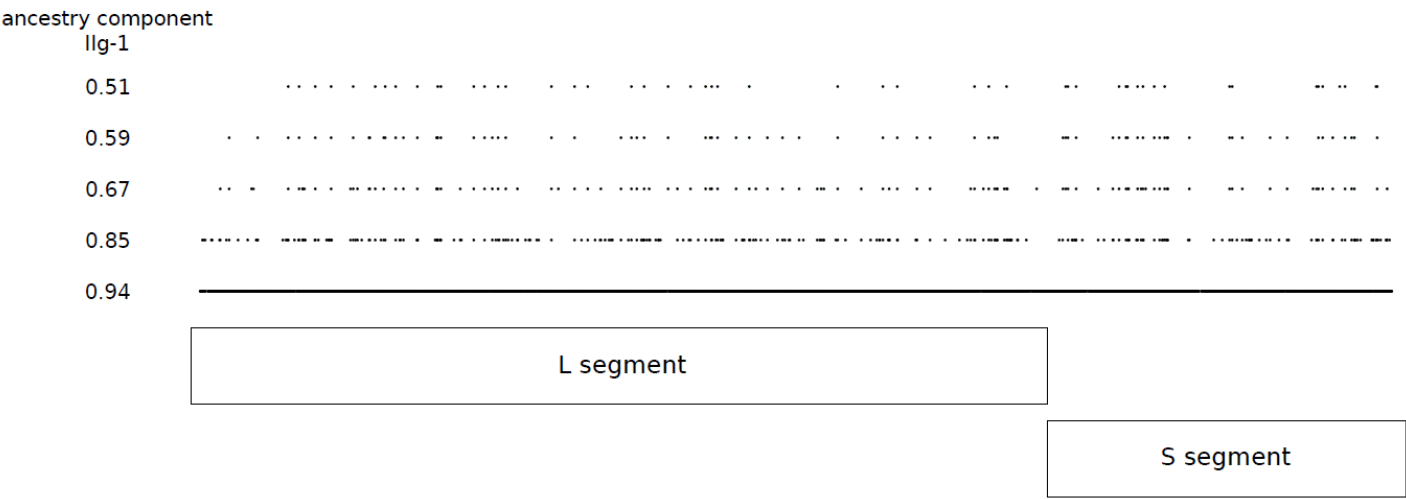

**Table S3.** Recombination events detected with RDP4.

| Event | Begin | End   | Recombinant           | Minor Parental        | Major Parental        | Notes                 | Detection Methods (p values) |          |          |          |
|-------|-------|-------|-----------------------|-----------------------|-----------------------|-----------------------|------------------------------|----------|----------|----------|
|       |       |       |                       |                       |                       |                       | RDP                          | GENECONV | Max chi  | Chimæra  |
| 1     | 8214  | 12232 | LM774-SLE-2012        | LM778-SLE-2012        | LM776-SLE-2012        | Already described [2] | 4.18E-19                     | 6.58E-18 | 1.65E-09 | 4.15E-10 |
| 2     | 8509  | 12165 | G2363-SLE-2012*       | G1529-SLE-2011        | Unknown               |                       | 1.16E-18                     | NS       | 1.16E-08 | 1.09E-06 |
| 3     | 8582  | 12150 | LM779-SLE-2012        | G692-SLE-2009         | G502-SLE-2009         |                       | 1.31E-15                     | NS       | 1.04E-08 | 2.16E-10 |
| 4     | 7838  | 12165 | 807978-LBR-1981*      | LF17019               | Unknown               | Already described [3] | 1.05E-14                     | NS       | 1.28E-04 | 7.80E-05 |
| 5     | 8300  | 11649 | LASV/NGA/2018/IRR_091 | LASV/NGA/2018/IRR_023 | LASV/NGA/2018/IRR_036 |                       | 3.08E-03                     | NS       | 1.54E-11 | 6.10E-11 |
| 6     | 7868  | 12161 | LASV/NGA/2018/IRR_052 | LASV/NGA/2015/IRR_011 | LASV/NGA/2018/IRR_048 |                       | 6.67E-09                     | NS       | 5.49E-07 | 1.07E-08 |
| 7     | 8280  | 12075 | LASV/NGA/2018/IRR_075 | ISTH2016-NIG-2012     | Nig08-A41             |                       | 5.94E-05                     | NS       | 1.77E-05 | 2.07E-06 |

NOTES: positions refer to genomic alignment

\* Admixed in STRUCTURE analysis

## References

1. Earl, D.A.; vonHoldt, B.M. STRUCTURE HARVESTER: A Website and Program for Visualizing STRUCTURE Output and Implementing the Evanno Method. *Cons Genet Res* **2012**, *4*, 359-361.
2. Andersen, K.G.; Shapiro, B.J.; Matranga, C.B.; Sealfon, R.; Lin, A.E.; Moses, L.M.; Folarin, O.A.; Goba, A.; Odi, I.; Ehiane, P.E.; *et al.* Clinical Sequencing Uncovers Origins and Evolution of Lassa Virus. *Cell* **2015**, *162*, 738-750.
3. Wiley, M.R.; Fakoli, L.; Letizia, A.G.; Welch, S.R.; Ladner, J.T.; Prieto, K.; Reyes, D.; Espy, N.; Chitty, J.A.; Pratt, C.B.; *et al.* Lassa Virus Circulating in Liberia: A Retrospective Genomic Characterisation. *Lancet Infect. Dis.* **2019**, *19*, 1371-1378
